# Supplementary material for: Factors and Processes Facilitating Recovery from Coercion in Mental Health Services—A Meta-Ethnography
Source: MDPI journal article supplement (doi:10.3390/healthcare12060628), 2024-03-11
Supplement: s1 [file s1]

|    |                            |   |   |   |   |   |   |   |   |   |   |   |
|----|----------------------------|---|---|---|---|---|---|---|---|---|---|---|
| 14 | Lanthén, et al. 2015       | Y | Y | Y | Y | Y | Y | Y | Y | Y | Y | Y |
| 15 | Ling, et al. 2015          | Y | Y | Y | Y | Y | Y | Y | Y | Y | Y | Y |
| 16 | McGuinness, et al. 2013    | Y | Y | Y | Y | Y | Y | Y | Y | Y | Y | Y |
| 17 | McGuinness, et al. 2018    | Y | Y | Y | Y | Y | Y | Y | Y | Y | Y | Y |
| 18 | Murphy, et al. 2017        | Y | Y | Y | Y | Y | Y | N | Y | Y | Y | Y |
| 19 | Olofsson & Jacobsson, 2001 | Y | Y | Y | Y | Y | Y | Y | Y | Y | Y | Y |
| 20 | Pridham, et al. 2018       | Y | Y | Y | Y | Y | Y | Y | Y | Y | Y | Y |
| 21 | Stroud, et al. 2015        | Y | Y | Y | Y | Y | Y | Y | Y | Y | Y | Y |
| 22 | Wyder, et al. 2015         | Y | Y | Y | Y | Y | Y | Y | Y | Y | Y | Y |
| 23 | Wyder, et al. 2016         | Y | Y | Y | Y | Y | Y | Y | Y | Y | Y | Y |

Notes. Y: Yes, CT: Can't Tell, N: No.

Source: Critical Appraisal Skills Programme (2018). CASP (Qualitative) Checklist. [online] Available at: [https://casp-uk.b-cdn.net/wp-content/uploads/2018/03/CASP-Qualitative-Checklist-2018\\_fillable\\_form.pdf](https://casp-uk.b-cdn.net/wp-content/uploads/2018/03/CASP-Qualitative-Checklist-2018_fillable_form.pdf). Accessed: 05.09.2022.
